# Supplementary material
Source: ML conference proceedings conference paper supplement (https://www.ecva.net/papers/eccv_2020/papers_ECCV/html/123580239_ECCV_2020_paper.php)
Supplement: Supplementary file 3 [file 123580239-supp.zip]

Archive with 141 entries (130 files):
- 1848_supplymentary/
- 1848_supplymentary/1848_interactive_viewer/
- __MACOSX/1848_supplymentary/._1848_interactive_viewer
- 1848_supplymentary/1848_supplementary_doc.pdf
- __MACOSX/1848_supplymentary/._1848_supplementary_doc.pdf
- 1848_supplymentary/1848_interactive_viewer/burst_02.html
- __MACOSX/1848_supplymentary/1848_interactive_viewer/._burst_02.html
- 1848_supplymentary/1848_interactive_viewer/index.html
- __MACOSX/1848_supplymentary/1848_interactive_viewer/._index.html
- 1848_supplymentary/1848_interactive_viewer/.DS_Store
- __MACOSX/1848_supplymentary/1848_interactive_viewer/._.DS_Store
- 1848_supplymentary/1848_interactive_viewer/burst_03.html
- __MACOSX/1848_supplymentary/1848_interactive_viewer/._burst_03.html
- 1848_supplymentary/1848_interactive_viewer/images/
- __MACOSX/1848_supplymentary/1848_interactive_viewer/._images
- 1848_supplymentary/1848_interactive_viewer/real_02.html
- __MACOSX/1848_supplymentary/1848_interactive_viewer/._real_02.html
- 1848_supplymentary/1848_interactive_viewer/burst_04.html
- __MACOSX/1848_supplymentary/1848_interactive_viewer/._burst_04.html
- 1848_supplymentary/1848_interactive_viewer/burst_05.html
- __MACOSX/1848_supplymentary/1848_interactive_viewer/._burst_05.html
- 1848_supplymentary/1848_interactive_viewer/burst_06.html
- __MACOSX/1848_supplymentary/1848_interactive_viewer/._burst_06.html
- 1848_supplymentary/1848_interactive_viewer/real_01.html
- __MACOSX/1848_supplymentary/1848_interactive_viewer/._real_01.html
- 1848_supplymentary/1848_interactive_viewer/burst_01.html
- __MACOSX/1848_supplymentary/1848_interactive_viewer/._burst_01.html
- 1848_supplymentary/1848_interactive_viewer/images/burst_04/
- __MACOSX/1848_supplymentary/1848_interactive_viewer/images/._burst_04
- 1848_supplymentary/1848_interactive_viewer/images/.DS_Store
- __MACOSX/1848_supplymentary/1848_interactive_viewer/images/._.DS_Store
- 1848_supplymentary/1848_interactive_viewer/images/burst_03/
- __MACOSX/1848_supplymentary/1848_interactive_viewer/images/._burst_03
- 1848_supplymentary/1848_interactive_viewer/images/comparison.css
- __MACOSX/1848_supplymentary/1848_interactive_viewer/images/._comparison.css
- 1848_supplymentary/1848_interactive_viewer/images/burst_02/
- __MACOSX/1848_supplymentary/1848_interactive_viewer/images/._burst_02
- 1848_supplymentary/1848_interactive_viewer/images/burst_05/
- __MACOSX/1848_supplymentary/1848_interactive_viewer/images/._burst_05
- 1848_supplymentary/1848_interactive_viewer/images/jquery.elevatezoom.js
- __MACOSX/1848_supplymentary/1848_interactive_viewer/images/._jquery.elevatezoom.js
- 1848_supplymentary/1848_interactive_viewer/images/real_01/
- __MACOSX/1848_supplymentary/1848_interactive_viewer/images/._real_01
- 1848_supplymentary/1848_interactive_viewer/images/jquery-1.8.3.min.js
- __MACOSX/1848_supplymentary/1848_interactive_viewer/images/._jquery-1.8.3.min.js
- 1848_supplymentary/1848_interactive_viewer/images/compare.js
- __MACOSX/1848_supplymentary/1848_interactive_viewer/images/._compare.js
- 1848_supplymentary/1848_interactive_viewer/images/burst_06/
- __MACOSX/1848_supplymentary/1848_interactive_viewer/images/._burst_06
- 1848_supplymentary/1848_interactive_viewer/images/burst_01/
- __MACOSX/1848_supplymentary/1848_interactive_viewer/images/._burst_01
- 1848_supplymentary/1848_interactive_viewer/images/real_02/
- __MACOSX/1848_supplymentary/1848_interactive_viewer/images/._real_02
- 1848_supplymentary/1848_interactive_viewer/images/burst_04/.DS_Store
- __MACOSX/1848_supplymentary/1848_interactive_viewer/images/burst_04/._.DS_Store
- 1848_supplymentary/1848_interactive_viewer/images/burst_04/kpn.png
- __MACOSX/1848_supplymentary/1848_interactive_viewer/images/burst_04/._kpn.png
- 1848_supplymentary/1848_interactive_viewer/images/burst_04/gt.png
- __MACOSX/1848_supplymentary/1848_interactive_viewer/images/burst_04/._gt.png
- 1848_supplymentary/1848_interactive_viewer/images/burst_04/noisy.png
- __MACOSX/1848_supplymentary/1848_interactive_viewer/images/burst_04/._noisy.png
- 1848_supplymentary/1848_interactive_viewer/images/burst_04/ours.png
- __MACOSX/1848_supplymentary/1848_interactive_viewer/images/burst_04/._ours.png
- 1848_supplymentary/1848_interactive_viewer/images/burst_04/avg_burst.png
- __MACOSX/1848_supplymentary/1848_interactive_viewer/images/burst_04/._avg_burst.png
- 1848_supplymentary/1848_interactive_viewer/images/burst_03/.DS_Store
- __MACOSX/1848_supplymentary/1848_interactive_viewer/images/burst_03/._.DS_Store
- 1848_supplymentary/1848_interactive_viewer/images/burst_03/kpn.png
- __MACOSX/1848_supplymentary/1848_interactive_viewer/images/burst_03/._kpn.png
- 1848_supplymentary/1848_interactive_viewer/images/burst_03/gt.png
- __MACOSX/1848_supplymentary/1848_interactive_viewer/images/burst_03/._gt.png
- 1848_supplymentary/1848_interactive_viewer/images/burst_03/noisy.png
- __MACOSX/1848_supplymentary/1848_interactive_viewer/images/burst_03/._noisy.png
- 1848_supplymentary/1848_interactive_viewer/images/burst_03/ours.png
- __MACOSX/1848_supplymentary/1848_interactive_viewer/images/burst_03/._ours.png
- 1848_supplymentary/1848_interactive_viewer/images/burst_03/avg_burst.png
- __MACOSX/1848_supplymentary/1848_interactive_viewer/images/burst_03/._avg_burst.png
- 1848_supplymentary/1848_interactive_viewer/images/burst_02/.DS_Store
- __MACOSX/1848_supplymentary/1848_interactive_viewer/images/burst_02/._.DS_Store
- 1848_supplymentary/1848_interactive_viewer/images/burst_02/kpn.png
- __MACOSX/1848_supplymentary/1848_interactive_viewer/images/burst_02/._kpn.png
- 1848_supplymentary/1848_interactive_viewer/images/burst_02/gt.png
- __MACOSX/1848_supplymentary/1848_interactive_viewer/images/burst_02/._gt.png
- 1848_supplymentary/1848_interactive_viewer/images/burst_02/noisy.png
- __MACOSX/1848_supplymentary/1848_interactive_viewer/images/burst_02/._noisy.png
- 1848_supplymentary/1848_interactive_viewer/images/burst_02/ours.png
- __MACOSX/1848_supplymentary/1848_interactive_viewer/images/burst_02/._ours.png
- 1848_supplymentary/1848_interactive_viewer/images/burst_02/avg_burst.png
- __MACOSX/1848_supplymentary/1848_interactive_viewer/images/burst_02/._avg_burst.png
- 1848_supplymentary/1848_interactive_viewer/images/burst_05/.DS_Store
- __MACOSX/1848_supplymentary/1848_interactive_viewer/images/burst_05/._.DS_Store
- 1848_supplymentary/1848_interactive_viewer/images/burst_05/kpn.png
- __MACOSX/1848_supplymentary/1848_interactive_viewer/images/burst_05/._kpn.png
- 1848_supplymentary/1848_interactive_viewer/images/burst_05/gt.png
- __MACOSX/1848_supplymentary/1848_interactive_viewer/images/burst_05/._gt.png
- 1848_supplymentary/1848_interactive_viewer/images/burst_05/noisy.png
- __MACOSX/1848_supplymentary/1848_interactive_viewer/images/burst_05/._noisy.png
- 1848_supplymentary/1848_interactive_viewer/images/burst_05/ours.png
- __MACOSX/1848_supplymentary/1848_interactive_viewer/images/burst_05/._ours.png
- 1848_supplymentary/1848_interactive_viewer/images/burst_05/avg_burst.png
- __MACOSX/1848_supplymentary/1848_interactive_viewer/images/burst_05/._avg_burst.png
- 1848_supplymentary/1848_interactive_viewer/images/real_01/.DS_Store
- __MACOSX/1848_supplymentary/1848_interactive_viewer/images/real_01/._.DS_Store
- 1848_supplymentary/1848_interactive_viewer/images/real_01/kpn.png
- __MACOSX/1848_supplymentary/1848_interactive_viewer/images/real_01/._kpn.png
- 1848_supplymentary/1848_interactive_viewer/images/real_01/noisy.png
- __MACOSX/1848_supplymentary/1848_interactive_viewer/images/real_01/._noisy.png
- 1848_supplymentary/1848_interactive_viewer/images/real_01/ours.png
- __MACOSX/1848_supplymentary/1848_interactive_viewer/images/real_01/._ours.png
- 1848_supplymentary/1848_interactive_viewer/images/burst_06/.DS_Store
- __MACOSX/1848_supplymentary/1848_interactive_viewer/images/burst_06/._.DS_Store
- 1848_supplymentary/1848_interactive_viewer/images/burst_06/kpn.png
- __MACOSX/1848_supplymentary/1848_interactive_viewer/images/burst_06/._kpn.png
- 1848_supplymentary/1848_interactive_viewer/images/burst_06/gt.png
- __MACOSX/1848_supplymentary/1848_interactive_viewer/images/burst_06/._gt.png
- 1848_supplymentary/1848_interactive_viewer/images/burst_06/noisy.png
- __MACOSX/1848_supplymentary/1848_interactive_viewer/images/burst_06/._noisy.png
- 1848_supplymentary/1848_interactive_viewer/images/burst_06/ours.png
- __MACOSX/1848_supplymentary/1848_interactive_viewer/images/burst_06/._ours.png
- 1848_supplymentary/1848_interactive_viewer/images/burst_06/avg_burst.png
- __MACOSX/1848_supplymentary/1848_interactive_viewer/images/burst_06/._avg_burst.png
- 1848_supplymentary/1848_interactive_viewer/images/burst_01/.DS_Store
- __MACOSX/1848_supplymentary/1848_interactive_viewer/images/burst_01/._.DS_Store
- 1848_supplymentary/1848_interactive_viewer/images/burst_01/kpn.png
- __MACOSX/1848_supplymentary/1848_interactive_viewer/images/burst_01/._kpn.png
- 1848_supplymentary/1848_interactive_viewer/images/burst_01/gt.png
- __MACOSX/1848_supplymentary/1848_interactive_viewer/images/burst_01/._gt.png
- 1848_supplymentary/1848_interactive_viewer/images/burst_01/noisy.png
- __MACOSX/1848_supplymentary/1848_interactive_viewer/images/burst_01/._noisy.png
- 1848_supplymentary/1848_interactive_viewer/images/burst_01/ours.png
- __MACOSX/1848_supplymentary/1848_interactive_viewer/images/burst_01/._ours.png
- 1848_supplymentary/1848_interactive_viewer/images/burst_01/avg_burst.png
- __MACOSX/1848_supplymentary/1848_interactive_viewer/images/burst_01/._avg_burst.png
- 1848_supplymentary/1848_interactive_viewer/images/real_02/.DS_Store
- __MACOSX/1848_supplymentary/1848_interactive_viewer/images/real_02/._.DS_Store
- 1848_supplymentary/1848_interactive_viewer/images/real_02/kpn.png
- __MACOSX/1848_supplymentary/1848_interactive_viewer/images/real_02/._kpn.png
- 1848_supplymentary/1848_interactive_viewer/images/real_02/noisy.png
- __MACOSX/1848_supplymentary/1848_interactive_viewer/images/real_02/._noisy.png
- 1848_supplymentary/1848_interactive_viewer/images/real_02/ours.png
- __MACOSX/1848_supplymentary/1848_interactive_viewer/images/real_02/._ours.png
