# Supplementary material
Source: ML conference proceedings conference paper supplement (https://www.ecva.net/papers/eccv_2020/papers_ECCV/html/123580239_ECCV_2020_paper.php)
Supplement: Supplementary file 3 [file 123580239-supp.zip › 1848_supplymentary/1848_interactive_viewer/burst_03.html]

Burst Denoising: A Fast, Fine, and Flexible Pipeline


# ECCV 2020 - Paper ID 1848

## Supplementary Material - Results of Our Proposed Model, compared with SotA

###### **Synthetic Burst Frames 01 | Synthetic Burst Frames 02 | Synthetic Burst Frames 03 | Synthetic Burst Frames 04 | Synthetic Burst Frames 05 | Synthetic Burst Frames 06 | Real Burst Frames 01 | Real Burst Frames 02 |**

---

### Synthetic Burst Frame 03

|  | | | | | |
| --- | --- | --- | --- | --- | --- |
| Ground Truth | Noisy Ref | Avg Burst | KPN | Ours |

You can cycle through the images by pressing '1' to '5'.

Interface adapted from here.

---
