# Supplementary material
Source: ML conference proceedings conference paper supplement (https://www.ecva.net/papers/eccv_2020/papers_ECCV/html/123580239_ECCV_2020_paper.php)
Supplement: Supplementary file 3 [file 123580239-supp.zip › 1848_supplymentary/1848_interactive_viewer/images/comparison.css]

body
{
	text-align: left;
	font-family: "Trebuchet MS";
	font-size: 14px;
	color: #404040;
}

h1
{
	margin-top: 20px;
	font-size: 32px;
}

h2
{
	font-size: 26px;
}

h3
{
	font-size: 24px;
}

h4
{
	font-size: 20px;
}

h5
{
	font-size: 16px;
}

h6
{
	font-size: 14px
}


a {
	text-decoration: underline;
	color: #555;
}
a:visited {
	color: #555;
}
a:active {
	color: #b34436;
}
a:hover {
	color: #b34436;
}

td {
	text-align: center;
}

img.thumbnail
{
	border-style: solid;
	width: 100;
}

p.thumbnail_title
{
	font-size: 13px;
	margin-top: 20px;
	margin-bottom: 2px;
}

img
{
	border-style: solid;
	border-width: 5px;
	border-color: black;
}
