# Supplementary material
Source: ML conference proceedings conference paper supplement (https://www.ecva.net/papers/eccv_2020/papers_ECCV/html/123580239_ECCV_2020_paper.php)
Supplement: Supplementary file 3 [file 123580239-supp.zip › 1848_supplymentary/1848_interactive_viewer/images/jquery.elevatezoom.js]

/*
 *	jQuery elevateZoom 3.0.8
 *	Demo's and documentation:
 *	www.elevateweb.co.uk/image-zoom
 *
 *	Copyright (c) 2012 Andrew Eades
 *	www.elevateweb.co.uk
 *
 *	Dual licensed under the GPL and MIT licenses.
 *	http://en.wikipedia.org/wiki/MIT_License
 *	http://en.wikipedia.org/wiki/GNU_General_Public_License
 *

/*
 *	jQuery elevateZoom 3.0.3
 *	Demo's and documentation:
 *	www.elevateweb.co.uk/image-zoom
 *
 *	Copyright (c) 2012 Andrew Eades
 *	www.elevateweb.co.uk
 *
 *	Dual licensed under the GPL and MIT licenses.
 *	http://en.wikipedia.org/wiki/MIT_License
 *	http://en.wikipedia.org/wiki/GNU_General_Public_License
 */


if ( typeof Object.create !== 'function' ) {
	Object.create = function( obj ) {
		function F() {};
		F.prototype = obj;
		return new F();
	};
}

(function( $, window, document, undefined ) {
	var ElevateZoom = {
			init: function( options, elem ) {
				var self = this;

				self.elem = elem;
				self.$elem = $( elem );

				self.imageSrc = self.$elem.data("zoom-image") ? self.$elem.data("zoom-image") : self.$elem.attr("src");

				self.options = $.extend( {}, $.fn.elevateZoom.options, options );

				//TINT OVERRIDE SETTINGS
				if(self.options.tint) {
					self.options.lensColour = "none", //colour of the lens background
					self.options.lensOpacity =  "1" //opacity of the lens
				}
				//INNER OVERRIDE SETTINGS
				if(self.options.zoomType == "inner") {self.options.showLens = false;}


				//Remove alt on hover

				self.$elem.parent().removeAttr('title').removeAttr('alt');

				self.zoomImage = self.imageSrc;

				self.refresh( 1 );


				//Create the image swap from the gallery 
				$('#'+self.options.gallery + ' a').click( function(e) { 

					//Set a class on the currently active gallery image
					if(self.options.galleryActiveClass){
						$('#'+self.options.gallery + ' a').removeClass(self.options.galleryActiveClass);
						$(this).addClass(self.options.galleryActiveClass);
					}
					//stop any link on the a tag from working
					e.preventDefault();

					//call the swap image function            
					if($(this).data("zoom-image")){self.zoomImagePre = $(this).data("zoom-image")}
					else{self.zoomImagePre = $(this).data("image");}
					self.swaptheimage($(this).data("image"), self.zoomImagePre);
					return false;
				});

			},

			refresh: function( length ) {
				var self = this;

				setTimeout(function() {
					self.fetch(self.imageSrc);

				}, length || self.options.refresh );
			},

			fetch: function(imgsrc) {
				//get the image
				var self = this;
				var newImg = new Image();
				newImg.onload = function() {
					//set the large image dimensions - used to calculte ratio's
					self.largeWidth = newImg.width;
					self.largeHeight = newImg.height;
					//once image is loaded start the calls
					self.startZoom();
					self.currentImage = self.imageSrc;
					//let caller know image has been loaded
					self.options.onZoomedImageLoaded(self.$elem);
				}
				newImg.src = imgsrc; // this must be done AFTER setting onload

				return;

			},

			startZoom: function( ) {
				var self = this;
				//get dimensions of the non zoomed image
				self.nzWidth = self.$elem.width();
				self.nzHeight = self.$elem.height();

				//activated elements
				self.isWindowActive = false;
				self.isLensActive = false;
				self.isTintActive = false;
				self.overWindow = false;    

				//CrossFade Wrappe
				if(self.options.imageCrossfade){
					self.zoomWrap = self.$elem.wrap('<div style="height:'+self.nzHeight+'px;width:'+self.nzWidth+'px;" class="zoomWrapper" />');        
					self.$elem.css('position', 'absolute'); 
				}

				self.zoomLock = 1;
				self.scrollingLock = false;
				self.changeBgSize = false;
				self.currentZoomLevel = self.options.zoomLevel;


				//get offset of the non zoomed image
				self.nzOffset = self.$elem.offset();
				//calculate the width ratio of the large/small image
				self.widthRatio = (self.largeWidth/self.currentZoomLevel) / self.nzWidth;
				self.heightRatio = (self.largeHeight/self.currentZoomLevel) / self.nzHeight; 


				//if window zoom        
				if(self.options.zoomType == "window") {
					self.zoomWindowStyle = "overflow: hidden;"
						+ "background-position: 0px 0px;text-align:center;"  
						+ "background-color: " + String(self.options.zoomWindowBgColour)            
						+ ";width: " + String(self.options.zoomWindowWidth) + "px;"
						+ "height: " + String(self.options.zoomWindowHeight)
						+ "px;float: left;"
						+ "background-size: "+ self.largeWidth/self.currentZoomLevel+ "px " +self.largeHeight/self.currentZoomLevel + "px;"
						+ "display: none;z-index:100;"
						+ "border: " + String(self.options.borderSize) 
						+ "px solid " + self.options.borderColour 
						+ ";background-repeat: no-repeat;"
						+ "position: absolute;";
				}    


				//if inner  zoom    
				if(self.options.zoomType == "inner") {
					//has a border been put on the image? Lets cater for this

					var borderWidth = self.$elem.css("border-left-width");

					self.zoomWindowStyle = "overflow: hidden;"
						+ "margin-left: " + String(borderWidth) + ";" 
						+ "margin-top: " + String(borderWidth) + ";"         
						+ "background-position: 0px 0px;"
						+ "width: " + String(self.nzWidth) + "px;"
						+ "height: " + String(self.nzHeight)
						+ "px;float: left;"
						+ "display: none;"
						+ "cursor:"+(self.options.cursor)+";"
						+ "px solid " + self.options.borderColour 
						+ ";background-repeat: no-repeat;"
						+ "position: absolute;";
				}    


				//lens style for window zoom
				if(self.options.zoomType == "window") {


					// adjust images less than the window height

					if(self.nzHeight < self.options.zoomWindowWidth/self.widthRatio){
						lensHeight = self.nzHeight;              
					}
					else{
						lensHeight = String((self.options.zoomWindowHeight/self.heightRatio))
					}
					if(self.largeWidth < self.options.zoomWindowWidth){
						lensWidth = self.nzWidth;
					}       
					else{
						lensWidth =  (self.options.zoomWindowWidth/self.widthRatio);
					}


					self.lensStyle = "background-position: 0px 0px;width: " + String((self.options.zoomWindowWidth)/self.widthRatio) + "px;height: " + String((self.options.zoomWindowHeight)/self.heightRatio)
					+ "px;float: right;display: none;"
					+ "overflow: hidden;"
					+ "z-index: 999;"   
					+ "-webkit-transform: translateZ(0);"               
					+ "opacity:"+(self.options.lensOpacity)+";filter: alpha(opacity = "+(self.options.lensOpacity*100)+"); zoom:1;"
					+ "width:"+lensWidth+"px;"
					+ "height:"+lensHeight+"px;"
					+ "background-color:"+(self.options.lensColour)+";"					
					+ "cursor:"+(self.options.cursor)+";"
					+ "border: "+(self.options.lensBorderSize)+"px" +
					" solid "+(self.options.lensBorderColour)+";background-repeat: no-repeat;position: absolute;";
				} 


				//tint style
				self.tintStyle = "display: block;"
					+ "position: absolute;"
					+ "background-color: "+self.options.tintColour+";"	
					+ "filter:alpha(opacity=0);"		
					+ "opacity: 0;"	
					+ "width: " + self.nzWidth + "px;"
					+ "height: " + self.nzHeight + "px;"

					;

				//lens style for lens zoom with optional round for modern browsers
				self.lensRound = '';

				if(self.options.zoomType == "lens") {

					self.lensStyle = "background-position: 0px 0px;"
						+ "float: left;display: none;"
						+ "border: " + String(self.options.borderSize) + "px solid " + self.options.borderColour+";"
						+ "width:"+ String(self.options.lensSize) +"px;"
						+ "height:"+ String(self.options.lensSize)+"px;"
						+ "background-repeat: no-repeat;position: absolute;";


				}


				//does not round in all browsers
				if(self.options.lensShape == "round") {
					self.lensRound = "border-top-left-radius: " + String(self.options.lensSize / 2 + self.options.borderSize) + "px;"
					+ "border-top-right-radius: " + String(self.options.lensSize / 2 + self.options.borderSize) + "px;"
					+ "border-bottom-left-radius: " + String(self.options.lensSize / 2 + self.options.borderSize) + "px;"
					+ "border-bottom-right-radius: " + String(self.options.lensSize / 2 + self.options.borderSize) + "px;";

				}

				//create the div's                                                + ""
				//self.zoomContainer = $('<div/>').addClass('zoomContainer').css({"position":"relative", "height":self.nzHeight, "width":self.nzWidth});

				self.zoomContainer = $('<div class="zoomContainer" style="-webkit-transform: translateZ(0);position:absolute;left:'+self.nzOffset.left+'px;top:'+self.nzOffset.top+'px;height:'+self.nzHeight+'px;width:'+self.nzWidth+'px;"></div>');
				$('body').append(self.zoomContainer);	


				//this will add overflow hidden and contrain the lens on lens mode       
				if(self.options.containLensZoom && self.options.zoomType == "lens"){
					self.zoomContainer.css("margin","5px");  // JK: fix for boundary!!!
					self.zoomContainer.css("overflow", "hidden");
				}
				if(self.options.zoomType != "inner") {
					self.zoomLens = $("<div class='zoomLens' style='" + self.lensStyle + self.lensRound +"'>&nbsp;</div>")
					.appendTo(self.zoomContainer)
					.click(function () {
						self.$elem.trigger('click');
					});


					if(self.options.tint) {
						self.tintContainer = $('<div/>').addClass('tintContainer');	
						self.zoomTint = $("<div class='zoomTint' style='"+self.tintStyle+"'></div>");


						self.zoomLens.wrap(self.tintContainer);


						self.zoomTintcss = self.zoomLens.after(self.zoomTint);	

						//if tint enabled - set an image to show over the tint

						self.zoomTintImage = $('<img style="position: absolute; left: 0px; top: 0px; max-width: none; width: '+self.nzWidth+'px; height: '+self.nzHeight+'px;" src="'+self.imageSrc+'">')
						.appendTo(self.zoomLens)
						.click(function () {

							self.$elem.trigger('click');
						});

					}          

				}


				//create zoom window 
				if(isNaN(self.options.zoomWindowPosition)){
					self.zoomWindow = $("<div style='z-index:999;left:"+(self.windowOffsetLeft)+"px;top:"+(self.windowOffsetTop)+"px;" + self.zoomWindowStyle + "' class='zoomWindow'>&nbsp;</div>")
					.appendTo('body')
					.click(function () {
						self.$elem.trigger('click');
					});
				}else{
					self.zoomWindow = $("<div style='z-index:999;left:"+(self.windowOffsetLeft)+"px;top:"+(self.windowOffsetTop)+"px;" + self.zoomWindowStyle + "' class='zoomWindow'>&nbsp;</div>")
					.appendTo(self.zoomContainer)
					.click(function () {
						self.$elem.trigger('click');
					});
				}              
				self.zoomWindowContainer = $('<div/>').addClass('zoomWindowContainer').css("width",self.options.zoomWindowWidth);
				self.zoomWindow.wrap(self.zoomWindowContainer);


				//  self.captionStyle = "text-align: left;background-color: black;color: white;font-weight: bold;padding: 10px;font-family: sans-serif;font-size: 11px";                                                                                                                                                                                                                                          
				// self.zoomCaption = $('<div class="elevatezoom-caption" style="'+self.captionStyle+'display: block; width: 280px;">INSERT ALT TAG</div>').appendTo(self.zoomWindow.parent());

				if(self.options.zoomType == "lens") {
					self.zoomLens.css({ backgroundImage: "url('" + self.imageSrc + "')" }); 
				}
				if(self.options.zoomType == "window") {
					self.zoomWindow.css({ backgroundImage: "url('" + self.imageSrc + "')" }); 
				}
				if(self.options.zoomType == "inner") {
					self.zoomWindow.css({ backgroundImage: "url('" + self.imageSrc + "')" }); 
				}
				/*-------------------END THE ZOOM WINDOW AND LENS----------------------------------*/
				//touch events
				self.$elem.bind('touchmove', function(e){    
					e.preventDefault();
					var touch = e.originalEvent.touches[0] || e.originalEvent.changedTouches[0];  
					self.setPosition(touch);

				});  
				self.zoomContainer.bind('touchmove', function(e){ 
					if(self.options.zoomType == "inner") {
						self.showHideWindow("show");

					}
					e.preventDefault();
					var touch = e.originalEvent.touches[0] || e.originalEvent.changedTouches[0];  
					self.setPosition(touch); 

				});  	
				self.zoomContainer.bind('touchend', function(e){ 
					self.showHideWindow("hide");
					if(self.options.showLens) {self.showHideLens("hide");}
					if(self.options.tint && self.options.zoomType != "inner") {self.showHideTint("hide");}
				});  	

				self.$elem.bind('touchend', function(e){ 
					self.showHideWindow("hide");
					if(self.options.showLens) {self.showHideLens("hide");}
					if(self.options.tint && self.options.zoomType != "inner") {self.showHideTint("hide");}
				});  	
				if(self.options.showLens) {
					self.zoomLens.bind('touchmove', function(e){ 

						e.preventDefault();
						var touch = e.originalEvent.touches[0] || e.originalEvent.changedTouches[0];  
						self.setPosition(touch); 
					});    


					self.zoomLens.bind('touchend', function(e){ 
						self.showHideWindow("hide");
						if(self.options.showLens) {self.showHideLens("hide");}
						if(self.options.tint && self.options.zoomType != "inner") {self.showHideTint("hide");}
					});  
				}
				//Needed to work in IE
				self.$elem.bind('mousemove', function(e){   
					if(self.overWindow == false){self.setElements("show");}
					//make sure on orientation change the setposition is not fired
					if(self.lastX !== e.clientX || self.lastY !== e.clientY){
						self.setPosition(e);
						self.currentLoc = e;
					}   
					self.lastX = e.clientX;
					self.lastY = e.clientY;    

				});  	

				self.zoomContainer.bind('mousemove', function(e){ 

					if(self.overWindow == false){self.setElements("show");} 

					//make sure on orientation change the setposition is not fired 
					if(self.lastX !== e.clientX || self.lastY !== e.clientY){
						self.setPosition(e);
						self.currentLoc = e;
					}   
					self.lastX = e.clientX;
					self.lastY = e.clientY;    
				});  	
				if(self.options.zoomType != "inner") {
					self.zoomLens.bind('mousemove', function(e){      
						//make sure on orientation change the setposition is not fired
						if(self.lastX !== e.clientX || self.lastY !== e.clientY){
							self.setPosition(e);
							self.currentLoc = e;
						}   
						self.lastX = e.clientX;
						self.lastY = e.clientY;    
					});
				}
				if(self.options.tint && self.options.zoomType != "inner") {
					self.zoomTint.bind('mousemove', function(e){ 
						//make sure on orientation change the setposition is not fired
						if(self.lastX !== e.clientX || self.lastY !== e.clientY){
							self.setPosition(e);
							self.currentLoc = e;
						}   
						self.lastX = e.clientX;
						self.lastY = e.clientY;    
					});

				}
				if(self.options.zoomType == "inner") {
					self.zoomWindow.bind('mousemove', function(e) {
						//self.overWindow = true;
						//make sure on orientation change the setposition is not fired
						if(self.lastX !== e.clientX || self.lastY !== e.clientY){
							self.setPosition(e);
							self.currentLoc = e;
						}   
						self.lastX = e.clientX;
						self.lastY = e.clientY;    
					});

				}


				//  lensFadeOut: 500,  zoomTintFadeIn
				self.zoomContainer.add(self.$elem).mouseenter(function(){

					if(self.overWindow == false){self.setElements("show");} 


				}).mouseleave(function(){
					if(!self.scrollLock){
						self.setElements("hide");
					}
				});
				//end ove image


				if(self.options.zoomType != "inner") {
					self.zoomWindow.mouseenter(function(){
						self.overWindow = true;   
						self.setElements("hide");                  
					}).mouseleave(function(){

						self.overWindow = false;
					});
				}
				//end ove image


//				var delta = parseInt(e.originalEvent.wheelDelta || -e.originalEvent.detail);

				//      $(this).empty();    
				//    return false;

				//fix for initial zoom setting
				if (self.options.zoomLevel != 1){
					//self.changeZoomLevel(self.currentZoomLevel);
				}
				//set the min zoomlevel
				if(self.options.minZoomLevel){
					self.minZoomLevel = self.options.minZoomLevel;
				}
				else{
					self.minZoomLevel = self.options.scrollZoomIncrement * 2;
				}


				if(self.options.scrollZoom){


					self.zoomContainer.add(self.$elem).bind('mousewheel DOMMouseScroll MozMousePixelScroll', function(e){


//						in IE there is issue with firing of mouseleave - So check whether still scrolling
//						and on mouseleave check if scrolllock          
						self.scrollLock = true;
						clearTimeout($.data(this, 'timer'));
						$.data(this, 'timer', setTimeout(function() {
							self.scrollLock = false;
							//do something
						}, 250));

						var theEvent = e.originalEvent.wheelDelta || e.originalEvent.detail*-1


						//this.scrollTop += ( delta < 0 ? 1 : -1 ) * 30;
						//   e.preventDefault();


						e.stopImmediatePropagation();
						e.stopPropagation();
						e.preventDefault();


						if(theEvent /120 > 0) {
							//scrolling up
							if(self.currentZoomLevel >= self.minZoomLevel){ 
								self.changeZoomLevel(self.currentZoomLevel-self.options.scrollZoomIncrement);        
							}

						}
						else{
							//scrolling down


							if(self.options.maxZoomLevel){
								if(self.currentZoomLevel <= self.options.maxZoomLevel){           
									self.changeZoomLevel(parseFloat(self.currentZoomLevel)+self.options.scrollZoomIncrement);
								}
							}
							else{
								//andy 

								self.changeZoomLevel(parseFloat(self.currentZoomLevel)+self.options.scrollZoomIncrement);
							}

						}
						return false;
					});
				}


			},
			setElements: function(type) {
				var self = this;
        if(!self.options.zoomEnabled){return false;}
				if(type=="show"){
					if(self.isWindowSet){
						if(self.options.zoomType == "inner") {self.showHideWindow("show");}
						if(self.options.zoomType == "window") {self.showHideWindow("show");}
						if(self.options.showLens) {self.showHideLens("show");}
						if(self.options.tint && self.options.zoomType != "inner") {self.showHideTint("show");
						}
					}
				}

				if(type=="hide"){
					if(self.options.zoomType == "window") {self.showHideWindow("hide");}
					if(!self.options.tint) {self.showHideWindow("hide");}
					if(self.options.showLens) {self.showHideLens("hide");}
					if(self.options.tint) {	self.showHideTint("hide");}
				}   
			},
			setPosition: function(e) {
      
				var self = this;
        
        if(!self.options.zoomEnabled){return false;}

				//recaclc offset each time in case the image moves
				//this can be caused by other on page elements
				self.nzHeight = self.$elem.height();
				self.nzWidth = self.$elem.width();
				self.nzOffset = self.$elem.offset();

				if(self.options.tint && self.options.zoomType != "inner") {
					self.zoomTint.css({ top: 0});
					self.zoomTint.css({ left: 0});
				}
				//set responsive       
				//will checking if the image needs changing before running this code work faster?
				if(self.options.responsive && !self.options.scrollZoom){
					if(self.options.showLens){ 
						if(self.nzHeight < self.options.zoomWindowWidth/self.widthRatio){
							lensHeight = self.nzHeight;              
						}
						else{
							lensHeight = String((self.options.zoomWindowHeight/self.heightRatio))
						}
						if(self.largeWidth < self.options.zoomWindowWidth){
							lensWidth = self.nzWidth;
						}       
						else{
							lensWidth =  (self.options.zoomWindowWidth/self.widthRatio);
						}
						self.widthRatio = self.largeWidth / self.nzWidth;
						self.heightRatio = self.largeHeight / self.nzHeight;        
						if(self.options.zoomType != "lens") {


							//possibly dont need to keep recalcalculating
							//if the lens is heigher than the image, then set lens size to image size
							if(self.nzHeight < self.options.zoomWindowWidth/self.widthRatio){
								lensHeight = self.nzHeight;  

							}
							else{
								lensHeight = String((self.options.zoomWindowHeight/self.heightRatio))
							}

							if(self.options.zoomWindowWidth < self.options.zoomWindowWidth){
								lensWidth = self.nzWidth;
							}       
							else{
								lensWidth =  (self.options.zoomWindowWidth/self.widthRatio);
							}            

							self.zoomLens.css('width', lensWidth);    
							self.zoomLens.css('height', lensHeight); 

							if(self.options.tint){    
								self.zoomTintImage.css('width', self.nzWidth);    
								self.zoomTintImage.css('height', self.nzHeight); 
							}

						}                     
						if(self.options.zoomType == "lens") {  

							self.zoomLens.css({ width: String(self.options.lensSize) + 'px', height: String(self.options.lensSize) + 'px' })      


						}        
						//end responsive image change
					}
				}

				//container fix
				self.zoomContainer.css({ top: self.nzOffset.top});
				self.zoomContainer.css({ left: self.nzOffset.left});
				self.mouseLeft = parseInt(e.pageX - self.nzOffset.left);
				self.mouseTop = parseInt(e.pageY - self.nzOffset.top);
				//calculate the Location of the Lens

				//calculate the bound regions - but only if zoom window
				if(self.options.zoomType == "window") {
					self.Etoppos = (self.mouseTop < (self.zoomLens.height()/2));
					self.Eboppos = (self.mouseTop > self.nzHeight - (self.zoomLens.height()/2)-(self.options.lensBorderSize*2));
					self.Eloppos = (self.mouseLeft < 0+((self.zoomLens.width()/2))); 
					self.Eroppos = (self.mouseLeft > (self.nzWidth - (self.zoomLens.width()/2)-(self.options.lensBorderSize*2)));  
				}
				//calculate the bound regions - but only for inner zoom
				if(self.options.zoomType == "inner"){ 
					self.Etoppos = (self.mouseTop < ((self.nzHeight/2)/self.heightRatio) );
					self.Eboppos = (self.mouseTop > (self.nzHeight - ((self.nzHeight/2)/self.heightRatio)));
					self.Eloppos = (self.mouseLeft < 0+(((self.nzWidth/2)/self.widthRatio)));
					self.Eroppos = (self.mouseLeft > (self.nzWidth - (self.nzWidth/2)/self.widthRatio-(self.options.lensBorderSize*2)));  
				}

				// if the mouse position of the slider is one of the outerbounds, then hide  window and lens
				if (self.mouseLeft <= 0 || self.mouseTop < 0 || self.mouseLeft > self.nzWidth || self.mouseTop > self.nzHeight ) {				          
					self.setElements("hide");
					return;
				}
				//else continue with operations
				else {


					//lens options
					if(self.options.showLens) {
						//		self.showHideLens("show");
						//set background position of lens
						self.lensLeftPos = String(self.mouseLeft - self.zoomLens.width() / 2);
						self.lensTopPos = String(self.mouseTop - self.zoomLens.height() / 2);


					}
					//adjust the background position if the mouse is in one of the outer regions 

					//Top region
					if(self.Etoppos){
						self.lensTopPos = 0;
					}
					//Left Region
					if(self.Eloppos){
						self.windowLeftPos = 0;
						self.lensLeftPos = 0;
						self.tintpos=0;
					}     
					//Set bottom and right region for window mode
					if(self.options.zoomType == "window") {
						if(self.Eboppos){
							self.lensTopPos = Math.max( (self.nzHeight)-self.zoomLens.height()-(self.options.lensBorderSize*2), 0 );
						} 
						if(self.Eroppos){
							self.lensLeftPos = (self.nzWidth-(self.zoomLens.width())-(self.options.lensBorderSize*2));
						}  
					}  
					//Set bottom and right region for inner mode
					if(self.options.zoomType == "inner") {
						if(self.Eboppos){
							self.lensTopPos = Math.max( ((self.nzHeight)-(self.options.lensBorderSize*2)), 0 );
						} 
						if(self.Eroppos){
							self.lensLeftPos = (self.nzWidth-(self.nzWidth)-(self.options.lensBorderSize*2));
						}  

					}
					//if lens zoom
					if(self.options.zoomType == "lens") {  
						self.windowLeftPos = String(((e.pageX - self.nzOffset.left) * self.widthRatio - self.zoomLens.width() / 2) * (-1));   
						self.windowTopPos = String(((e.pageY - self.nzOffset.top) * self.heightRatio - self.zoomLens.height() / 2) * (-1));

						self.zoomLens.css({ backgroundPosition: self.windowLeftPos + 'px ' + self.windowTopPos + 'px' });

						if(self.changeBgSize){  

							if(self.nzHeight>self.nzWidth){  
								if(self.options.zoomType == "lens"){       
									self.zoomLens.css({ "background-size": self.largeWidth/self.newvalueheight + 'px ' + self.largeHeight/self.newvalueheight + 'px' });
								}   

								self.zoomWindow.css({ "background-size": self.largeWidth/self.newvalueheight + 'px ' + self.largeHeight/self.newvalueheight + 'px' });
							}
							else{     
								if(self.options.zoomType == "lens"){       
									self.zoomLens.css({ "background-size": self.largeWidth/self.newvaluewidth + 'px ' + self.largeHeight/self.newvaluewidth + 'px' });
								}   
								self.zoomWindow.css({ "background-size": self.largeWidth/self.newvaluewidth + 'px ' + self.largeHeight/self.newvaluewidth + 'px' });            
							}
							self.changeBgSize = false;
						}    

						self.setWindowPostition(e);  
					}
					//if tint zoom   
					if(self.options.tint && self.options.zoomType != "inner") {
						self.setTintPosition(e);

					}
					//set the css background position 
					if(self.options.zoomType == "window") {
						self.setWindowPostition(e);   
					}
					if(self.options.zoomType == "inner") {
						self.setWindowPostition(e);   
					}
					if(self.options.showLens) {
						if(self.fullwidth && self.options.zoomType != "lens"){
							self.lensLeftPos = 0;
						}
						// lP = String(parseInt(self.lensLeftPos)+0);
						// tP = String(parseInt(self.lensTopPos)+0);
						// self.zoomLens.css({ left: lP + 'px', top: tP + 'px' });
						self.zoomLens.css({ left: self.lensLeftPos + 'px', top: self.lensTopPos + 'px' });
					}

				} //end else


			},
			showHideWindow: function(change) {
				var self = this;              
				if(change == "show"){      
					if(!self.isWindowActive){
						if(self.options.zoomWindowFadeIn){
							self.zoomWindow.stop(true, true, false).fadeIn(self.options.zoomWindowFadeIn);
						}
						else{self.zoomWindow.show();}
						self.isWindowActive = true;
					}            
				}
				if(change == "hide"){
					if(self.isWindowActive){
						if(self.options.zoomWindowFadeOut){
							self.zoomWindow.stop(true, true).fadeOut(self.options.zoomWindowFadeOut);
						}
						else{self.zoomWindow.hide();}
						self.isWindowActive = false;        
					}      
				}
			},
			showHideLens: function(change) {
				var self = this;              
				if(change == "show"){      
					if(!self.isLensActive){
						if(self.options.lensFadeIn){
							self.zoomLens.stop(true, true, false).fadeIn(self.options.lensFadeIn);
						}
						else{self.zoomLens.show();}
						self.isLensActive = true;
					}            
				}
				if(change == "hide"){
					if(self.isLensActive){
						if(self.options.lensFadeOut){
							self.zoomLens.stop(true, true).fadeOut(self.options.lensFadeOut);
						}
						else{self.zoomLens.hide();}
						self.isLensActive = false;        
					}      
				}
			},
			showHideTint: function(change) {
				var self = this;              
				if(change == "show"){      
					if(!self.isTintActive){

						if(self.options.zoomTintFadeIn){
							self.zoomTint.css({opacity:self.options.tintOpacity}).animate().stop(true, true).fadeIn("slow");
						}
						else{
							self.zoomTint.css({opacity:self.options.tintOpacity}).animate();
							self.zoomTint.show();


						}
						self.isTintActive = true;
					}            
				}
				if(change == "hide"){      
					if(self.isTintActive){ 

						if(self.options.zoomTintFadeOut){
							self.zoomTint.stop(true, true).fadeOut(self.options.zoomTintFadeOut);
						}
						else{self.zoomTint.hide();}
						self.isTintActive = false;        
					}      
				}
			},
			setLensPostition: function( e ) {


			},
			setWindowPostition: function( e ) {
				//return obj.slice( 0, count );
				var self = this;

				if(!isNaN(self.options.zoomWindowPosition)){

					switch (self.options.zoomWindowPosition) { 
					case 1: //done         
						self.windowOffsetTop = (self.options.zoomWindowOffety);//DONE - 1
						self.windowOffsetLeft =(+self.nzWidth); //DONE 1, 2, 3, 4, 16
						break;
					case 2:
						if(self.options.zoomWindowHeight > self.nzHeight){ //positive margin

							self.windowOffsetTop = ((self.options.zoomWindowHeight/2)-(self.nzHeight/2))*(-1);
							self.windowOffsetLeft =(self.nzWidth); //DONE 1, 2, 3, 4, 16
						}
						else{ //negative margin

						}
						break;
					case 3: //done        
						self.windowOffsetTop = (self.nzHeight - self.zoomWindow.height() - (self.options.borderSize*2)); //DONE 3,9
						self.windowOffsetLeft =(self.nzWidth); //DONE 1, 2, 3, 4, 16
						break;      
					case 4: //done  
						self.windowOffsetTop = (self.nzHeight); //DONE - 4,5,6,7,8
						self.windowOffsetLeft =(self.nzWidth); //DONE 1, 2, 3, 4, 16
						break;
					case 5: //done  
						self.windowOffsetTop = (self.nzHeight); //DONE - 4,5,6,7,8
						self.windowOffsetLeft =(self.nzWidth-self.zoomWindow.width()-(self.options.borderSize*2)); //DONE - 5,15
						break;
					case 6: 
						if(self.options.zoomWindowHeight > self.nzHeight){ //positive margin
							self.windowOffsetTop = (self.nzHeight);  //DONE - 4,5,6,7,8

							self.windowOffsetLeft =((self.options.zoomWindowWidth/2)-(self.nzWidth/2)+(self.options.borderSize*2))*(-1);  
						}
						else{ //negative margin

						}


						break;
					case 7: //done  
						self.windowOffsetTop = (self.nzHeight);  //DONE - 4,5,6,7,8
						self.windowOffsetLeft = 0; //DONE 7, 13
						break;
					case 8: //done  
						self.windowOffsetTop = (self.nzHeight); //DONE - 4,5,6,7,8
						self.windowOffsetLeft =(self.zoomWindow.width()+(self.options.borderSize*2) )* (-1);  //DONE 8,9,10,11,12
						break;
					case 9:  //done  
						self.windowOffsetTop = (self.nzHeight - self.zoomWindow.height() - (self.options.borderSize*2)); //DONE 3,9
						self.windowOffsetLeft =(self.zoomWindow.width()+(self.options.borderSize*2) )* (-1);  //DONE 8,9,10,11,12
						break;
					case 10: 
						if(self.options.zoomWindowHeight > self.nzHeight){ //positive margin

							self.windowOffsetTop = ((self.options.zoomWindowHeight/2)-(self.nzHeight/2))*(-1);
							self.windowOffsetLeft =(self.zoomWindow.width()+(self.options.borderSize*2) )* (-1);  //DONE 8,9,10,11,12
						}
						else{ //negative margin

						}
						break;
					case 11: 
						self.windowOffsetTop = (self.options.zoomWindowOffety);
						self.windowOffsetLeft =(self.zoomWindow.width()+(self.options.borderSize*2) )* (-1);  //DONE 8,9,10,11,12
						break;
					case 12: //done  
						self.windowOffsetTop = (self.zoomWindow.height()+(self.options.borderSize*2))*(-1); //DONE 12,13,14,15,16
						self.windowOffsetLeft =(self.zoomWindow.width()+(self.options.borderSize*2) )* (-1);  //DONE 8,9,10,11,12
						break;
					case 13: //done  
						self.windowOffsetTop = (self.zoomWindow.height()+(self.options.borderSize*2))*(-1); //DONE 12,13,14,15,16
						self.windowOffsetLeft =(0); //DONE 7, 13
						break;
					case 14: 
						if(self.options.zoomWindowHeight > self.nzHeight){ //positive margin
							self.windowOffsetTop = (self.zoomWindow.height()+(self.options.borderSize*2))*(-1); //DONE 12,13,14,15,16

							self.windowOffsetLeft =((self.options.zoomWindowWidth/2)-(self.nzWidth/2)+(self.options.borderSize*2))*(-1);  
						}
						else{ //negative margin

						}

						break;
					case 15://done   
						self.windowOffsetTop = (self.zoomWindow.height()+(self.options.borderSize*2))*(-1); //DONE 12,13,14,15,16
						self.windowOffsetLeft =(self.nzWidth-self.zoomWindow.width()-(self.options.borderSize*2)); //DONE - 5,15
						break;
					case 16:  //done  
						self.windowOffsetTop = (self.zoomWindow.height()+(self.options.borderSize*2))*(-1); //DONE 12,13,14,15,16
						self.windowOffsetLeft =(self.nzWidth); //DONE 1, 2, 3, 4, 16
						break;            
					default: //done  
						self.windowOffsetTop = (self.options.zoomWindowOffety);//DONE - 1
					self.windowOffsetLeft =(self.nzWidth); //DONE 1, 2, 3, 4, 16
					} 
				} //end isNAN
				else{
					//WE CAN POSITION IN A CLASS - ASSUME THAT ANY STRING PASSED IS
					self.externalContainer = $('#'+self.options.zoomWindowPosition);
					self.externalContainerWidth = self.externalContainer.width();
					self.externalContainerHeight = self.externalContainer.height();
					self.externalContainerOffset = self.externalContainer.offset();

					self.windowOffsetTop = self.externalContainerOffset.top;//DONE - 1
					self.windowOffsetLeft =self.externalContainerOffset.left; //DONE 1, 2, 3, 4, 16

				}
				self.isWindowSet = true;
				self.windowOffsetTop = self.windowOffsetTop + self.options.zoomWindowOffety;
				self.windowOffsetLeft = self.windowOffsetLeft + self.options.zoomWindowOffetx;

				self.zoomWindow.css({ top: self.windowOffsetTop});
				self.zoomWindow.css({ left: self.windowOffsetLeft});

				if(self.options.zoomType == "inner") {
					self.zoomWindow.css({ top: 0});
					self.zoomWindow.css({ left: 0});

				}   


				self.windowLeftPos = String(((e.pageX - self.nzOffset.left) * self.widthRatio - self.zoomWindow.width() / 2) * (-1));   
				self.windowTopPos = String(((e.pageY - self.nzOffset.top) * self.heightRatio - self.zoomWindow.height() / 2) * (-1));
				if(self.Etoppos){self.windowTopPos = 0;}
				if(self.Eloppos){self.windowLeftPos = 0;}     
				if(self.Eboppos){self.windowTopPos = (self.largeHeight/self.currentZoomLevel-self.zoomWindow.height())*(-1);  } 
				if(self.Eroppos){self.windowLeftPos = ((self.largeWidth/self.currentZoomLevel-self.zoomWindow.width())*(-1));}    

				//stops micro movements
				if(self.fullheight){
					self.windowTopPos = 0;

				}
				if(self.fullwidth){
					self.windowLeftPos = 0;

				}
				//set the css background position 


				if(self.options.zoomType == "window" || self.options.zoomType == "inner") {

					if(self.zoomLock == 1){
						//overrides for images not zoomable
						if(self.widthRatio <= 1){

							self.windowLeftPos = 0;
						}
						if(self.heightRatio <= 1){ 
							self.windowTopPos = 0;
						}
					}
					// adjust images less than the window height

					if(self.largeHeight < self.options.zoomWindowHeight){

						self.windowTopPos = 0;
					}
					if(self.largeWidth < self.options.zoomWindowWidth){
						self.windowLeftPos = 0;
					}       

					//set the zoomwindow background position
					if (self.options.easing){

						//     if(self.changeZoom){
						//           clearInterval(self.loop);
						//           self.changeZoom = false;
						//           self.loop = false;

						//            }
						//set the pos to 0 if not set
						if(!self.xp){self.xp = 0;}
						if(!self.yp){self.yp = 0;}  
						//if loop not already started, then run it 
						if (!self.loop){           
							self.loop = setInterval(function(){                
								//using zeno's paradox    

								self.xp += (self.windowLeftPos  - self.xp) / self.options.easingAmount; 
								self.yp += (self.windowTopPos  - self.yp) / self.options.easingAmount;
								if(self.scrollingLock){


									clearInterval(self.loop);
									self.xp = self.windowLeftPos;
									self.yp = self.windowTopPos            

									self.xp = ((e.pageX - self.nzOffset.left) * self.widthRatio - self.zoomWindow.width() / 2) * (-1);
									self.yp = (((e.pageY - self.nzOffset.top) * self.heightRatio - self.zoomWindow.height() / 2) * (-1));                         

									if(self.changeBgSize){    
										if(self.nzHeight>self.nzWidth){  
											if(self.options.zoomType == "lens"){      
												self.zoomLens.css({ "background-size": self.largeWidth/self.newvalueheight + 'px ' + self.largeHeight/self.newvalueheight + 'px' });
											}   
											self.zoomWindow.css({ "background-size": self.largeWidth/self.newvalueheight + 'px ' + self.largeHeight/self.newvalueheight + 'px' });
										}
										else{   
											if(self.options.zoomType != "lens"){      
												self.zoomLens.css({ "background-size": self.largeWidth/self.newvaluewidth + 'px ' + self.largeHeight/self.newvalueheight + 'px' });
											}            
											self.zoomWindow.css({ "background-size": self.largeWidth/self.newvaluewidth + 'px ' + self.largeHeight/self.newvaluewidth + 'px' });            

										}

										/*
             if(!self.bgxp){self.bgxp = self.largeWidth/self.newvalue;}
						if(!self.bgyp){self.bgyp = self.largeHeight/self.newvalue ;}  
                 if (!self.bgloop){   
                 	self.bgloop = setInterval(function(){   

                 self.bgxp += (self.largeWidth/self.newvalue  - self.bgxp) / self.options.easingAmount; 
								self.bgyp += (self.largeHeight/self.newvalue  - self.bgyp) / self.options.easingAmount;

           self.zoomWindow.css({ "background-size": self.bgxp + 'px ' + self.bgyp + 'px' });


                  }, 16);

                 }
										 */
										self.changeBgSize = false;
									}

									self.zoomWindow.css({ backgroundPosition: self.windowLeftPos + 'px ' + self.windowTopPos + 'px' });
									self.scrollingLock = false;
									self.loop = false;

								}
								else{
									if(self.changeBgSize){    
										if(self.nzHeight>self.nzWidth){ 
											if(self.options.zoomType == "lens"){      
												self.zoomLens.css({ "background-size": self.largeWidth/self.newvalueheight + 'px ' + self.largeHeight/self.newvalueheight + 'px' });
											}         
											self.zoomWindow.css({ "background-size": self.largeWidth/self.newvalueheight + 'px ' + self.largeHeight/self.newvalueheight + 'px' });
										}
										else{                 
											if(self.options.zoomType != "lens"){     
												self.zoomLens.css({ "background-size": self.largeWidth/self.newvaluewidth + 'px ' + self.largeHeight/self.newvaluewidth + 'px' });
											}      
											self.zoomWindow.css({ "background-size": self.largeWidth/self.newvaluewidth + 'px ' + self.largeHeight/self.newvaluewidth + 'px' });            
										}
										self.changeBgSize = false;
									}                   

									self.zoomWindow.css({ backgroundPosition: self.xp + 'px ' + self.yp + 'px' });
								}       
							}, 16);
						}
					}   
					else{    
						if(self.changeBgSize){  
							if(self.nzHeight>self.nzWidth){  
								if(self.options.zoomType == "lens"){      
									self.zoomLens.css({ "background-size": self.largeWidth/self.newvalueheight + 'px ' + self.largeHeight/self.newvalueheight + 'px' });
								} 

								self.zoomWindow.css({ "background-size": self.largeWidth/self.newvalueheight + 'px ' + self.largeHeight/self.newvalueheight + 'px' });
							}
							else{     
								if(self.options.zoomType == "lens"){      
									self.zoomLens.css({ "background-size": self.largeWidth/self.newvaluewidth + 'px ' + self.largeHeight/self.newvaluewidth + 'px' });
								} 
								if((self.largeHeight/self.newvaluewidth) < self.options.zoomWindowHeight){ 

									self.zoomWindow.css({ "background-size": self.largeWidth/self.newvaluewidth + 'px ' + self.largeHeight/self.newvaluewidth + 'px' });            
								}
								else{

									self.zoomWindow.css({ "background-size": self.largeWidth/self.newvalueheight + 'px ' + self.largeHeight/self.newvalueheight + 'px' });   
								}

							}
							self.changeBgSize = false;
						}     

						self.zoomWindow.css({ backgroundPosition: self.windowLeftPos + 'px ' + self.windowTopPos + 'px' });       
					}
				} 
			},
			setTintPosition: function(e){
				var self = this;
				self.nzOffset = self.$elem.offset();
				self.tintpos = String(((e.pageX - self.nzOffset.left)-(self.zoomLens.width() / 2)) * (-1)); 
				self.tintposy = String(((e.pageY - self.nzOffset.top) - self.zoomLens.height() / 2) * (-1));	
				if(self.Etoppos){
					self.tintposy = 0;
				}
				if(self.Eloppos){
					self.tintpos=0;
				}     
				if(self.Eboppos){
					self.tintposy = (self.nzHeight-self.zoomLens.height()-(self.options.lensBorderSize*2))*(-1);
				} 
				if(self.Eroppos){
					self.tintpos = ((self.nzWidth-self.zoomLens.width()-(self.options.lensBorderSize*2))*(-1));
				}    
				if(self.options.tint) {
					//stops micro movements
					if(self.fullheight){
						self.tintposy = 0;

					}
					if(self.fullwidth){ 
						self.tintpos = 0;

					}   
					self.zoomTintImage.css({'left': self.tintpos+'px'});
					self.zoomTintImage.css({'top': self.tintposy+'px'});
				}
			},

			swaptheimage: function(smallimage, largeimage){
				var self = this;
				var newImg = new Image(); 

				if(self.options.loadingIcon){
					self.spinner = $('<div style="background: url(\''+self.options.loadingIcon+'\') no-repeat center;height:'+self.nzHeight+'px;width:'+self.nzWidth+'px;z-index: 2000;position: absolute; background-position: center center;"></div>');
					self.$elem.after(self.spinner);
				}

				self.options.onImageSwap(self.$elem);

				newImg.onload = function() {
					newImg.width = newImg.width * 2;  //JK: zoom by factor of 2
					newImg.height = newImg.height * 2;
					self.largeWidth = newImg.width;
					self.largeHeight = newImg.height;
					self.zoomImage = largeimage;
					self.zoomLens.css({ "background-size": self.largeWidth + 'px ' + self.largeHeight + 'px' });  // JK: fixing bug. this is zoomLens!
					self.zoomWindow.css({ "background-size": self.largeWidth + 'px ' + self.largeHeight + 'px' });


					self.swapAction(smallimage, largeimage);
					return;              
				}          
				newImg.src = largeimage; // this must be done AFTER setting onload

			},
			swapAction: function(smallimage, largeimage){


				var self = this;    

				var newImg2 = new Image(); 
				newImg2.onload = function() {
					//re-calculate values
					self.nzHeight = newImg2.height;
					self.nzWidth = newImg2.width;
					self.options.onImageSwapComplete(self.$elem);

					self.doneCallback();  
					return;      
				}          
				newImg2.src = smallimage; 

				//reset the zoomlevel to that initially set in options
				self.currentZoomLevel = self.options.zoomLevel;
				self.options.maxZoomLevel = false;

				//swaps the main image
				//self.$elem.attr("src",smallimage);
				//swaps the zoom image     
				if(self.options.zoomType == "lens") {
					self.zoomLens.css({ backgroundImage: "url('" + largeimage + "')" }); 
				}
				if(self.options.zoomType == "window") {
					self.zoomWindow.css({ backgroundImage: "url('" + largeimage + "')" }); 
				}
				if(self.options.zoomType == "inner") {
					self.zoomWindow.css({ backgroundImage: "url('" + largeimage + "')" }); 
				} 


				self.currentImage = largeimage;

				if(self.options.imageCrossfade){
					var oldImg = self.$elem;
					var newImg = oldImg.clone();         
					self.$elem.attr("src",smallimage)
					self.$elem.after(newImg);
					newImg.stop(true).fadeOut(self.options.imageCrossfade, function() {
						$(this).remove();         
					});

					//       				if(self.options.zoomType == "inner"){
					//remove any attributes on the cloned image so we can resize later
					self.$elem.width("auto").removeAttr("width");
					self.$elem.height("auto").removeAttr("height");
					//   }

					oldImg.fadeIn(self.options.imageCrossfade);

					if(self.options.tint && self.options.zoomType != "inner") {

						var oldImgTint = self.zoomTintImage;
						var newImgTint = oldImgTint.clone();         
						self.zoomTintImage.attr("src",largeimage)
						self.zoomTintImage.after(newImgTint);
						newImgTint.stop(true).fadeOut(self.options.imageCrossfade, function() {
							$(this).remove();         
						});


						oldImgTint.fadeIn(self.options.imageCrossfade);


						//self.zoomTintImage.attr("width",elem.data("image"));

						//resize the tint window
						self.zoomTint.css({ height: self.$elem.height()});
						self.zoomTint.css({ width: self.$elem.width()});
					}    

					self.zoomContainer.css("height", self.$elem.height());
					self.zoomContainer.css("width", self.$elem.width());

					if(self.options.zoomType == "inner"){ 
						if(!self.options.constrainType){
							self.zoomWrap.parent().css("height", self.$elem.height());
							self.zoomWrap.parent().css("width", self.$elem.width());

							self.zoomWindow.css("height", self.$elem.height());
							self.zoomWindow.css("width", self.$elem.width());
						}
					} 

					if(self.options.imageCrossfade){  
						self.zoomWrap.css("height", self.$elem.height());
						self.zoomWrap.css("width", self.$elem.width());
					} 
				}
				else{
					self.$elem.attr("src",smallimage); 
					if(self.options.tint) {
						self.zoomTintImage.attr("src",largeimage);
						//self.zoomTintImage.attr("width",elem.data("image"));
						self.zoomTintImage.attr("height",self.$elem.height());
						//self.zoomTintImage.attr('src') = elem.data("image");
						self.zoomTintImage.css({ height: self.$elem.height()}); 
						self.zoomTint.css({ height: self.$elem.height()});

					}
					self.zoomContainer.css("height", self.$elem.height());
					self.zoomContainer.css("width", self.$elem.width());

					if(self.options.imageCrossfade){  
						self.zoomWrap.css("height", self.$elem.height());
						self.zoomWrap.css("width", self.$elem.width());
					} 
				}              
				if(self.options.constrainType){     

					//This will contrain the image proportions
					if(self.options.constrainType == "height"){ 

						self.zoomContainer.css("height", self.options.constrainSize);
						self.zoomContainer.css("width", "auto");

						if(self.options.imageCrossfade){  
							self.zoomWrap.css("height", self.options.constrainSize);
							self.zoomWrap.css("width", "auto"); 
							self.constwidth = self.zoomWrap.width();


						}
						else{                  
							self.$elem.css("height", self.options.constrainSize);
							self.$elem.css("width", "auto");
							self.constwidth = self.$elem.width();
						} 

						if(self.options.zoomType == "inner"){

							self.zoomWrap.parent().css("height", self.options.constrainSize);
							self.zoomWrap.parent().css("width", self.constwidth);   
							self.zoomWindow.css("height", self.options.constrainSize);
							self.zoomWindow.css("width", self.constwidth);    
						}        
						if(self.options.tint){
							self.tintContainer.css("height", self.options.constrainSize);
							self.tintContainer.css("width", self.constwidth);
							self.zoomTint.css("height", self.options.constrainSize);
							self.zoomTint.css("width", self.constwidth);
							self.zoomTintImage.css("height", self.options.constrainSize);
							self.zoomTintImage.css("width", self.constwidth); 
						} 

					}
					if(self.options.constrainType == "width"){       
						self.zoomContainer.css("height", "auto");
						self.zoomContainer.css("width", self.options.constrainSize);

						if(self.options.imageCrossfade){
							self.zoomWrap.css("height", "auto");
							self.zoomWrap.css("width", self.options.constrainSize);
							self.constheight = self.zoomWrap.height();
						}
						else{            
							self.$elem.css("height", "auto");
							self.$elem.css("width", self.options.constrainSize); 
							self.constheight = self.$elem.height();              
						} 
						if(self.options.zoomType == "inner"){
							self.zoomWrap.parent().css("height", self.constheight);
							self.zoomWrap.parent().css("width", self.options.constrainSize);   
							self.zoomWindow.css("height", self.constheight);
							self.zoomWindow.css("width", self.options.constrainSize);    
						} 
						if(self.options.tint){
							self.tintContainer.css("height", self.constheight);
							self.tintContainer.css("width", self.options.constrainSize);
							self.zoomTint.css("height", self.constheight);
							self.zoomTint.css("width", self.options.constrainSize);
							self.zoomTintImage.css("height", self.constheight);
							self.zoomTintImage.css("width", self.options.constrainSize); 
						}   

					}        


				}

			},
			doneCallback: function(){

				var self = this;
				if(self.options.loadingIcon){
					self.spinner.hide();     
				}   

				self.nzOffset = self.$elem.offset();
				self.nzWidth = self.$elem.width();
				self.nzHeight = self.$elem.height();

				// reset the zoomlevel back to default
				self.currentZoomLevel = self.options.zoomLevel;

				//ratio of the large to small image
				self.widthRatio = self.largeWidth / self.nzWidth;
				self.heightRatio = self.largeHeight / self.nzHeight; 

				//NEED TO ADD THE LENS SIZE FOR ROUND
				// adjust images less than the window height
				if(self.options.zoomType == "window") {

					if(self.nzHeight < self.options.zoomWindowWidth/self.widthRatio){
						lensHeight = self.nzHeight;  

					}
					else{
						lensHeight = String((self.options.zoomWindowHeight/self.heightRatio))
					}

					if(self.options.zoomWindowWidth < self.options.zoomWindowWidth){
						lensWidth = self.nzWidth;
					}       
					else{
						lensWidth =  (self.options.zoomWindowWidth/self.widthRatio);
					}


					if(self.zoomLens){

						self.zoomLens.css('width', lensWidth);    
						self.zoomLens.css('height', lensHeight); 


					}
				}
			},
			getCurrentImage: function(){
				var self = this;  
				return self.zoomImage; 
			}, 
			getGalleryList: function(){
				var self = this;   
				//loop through the gallery options and set them in list for fancybox
				self.gallerylist = [];
				if (self.options.gallery){ 


					$('#'+self.options.gallery + ' a').each(function() {

						var img_src = '';
						if($(this).data("zoom-image")){
							img_src = $(this).data("zoom-image");
						}
						else if($(this).data("image")){
							img_src = $(this).data("image");
						}			
						//put the current image at the start
						if(img_src == self.zoomImage){
							self.gallerylist.unshift({
								href: ''+img_src+'',
								title: $(this).find('img').attr("title")
							});	
						}
						else{
							self.gallerylist.push({
								href: ''+img_src+'',
								title: $(this).find('img').attr("title")
							});
						}


					});
				}                                                       
				//if no gallery - return current image
				else{
					self.gallerylist.push({
						href: ''+self.zoomImage+'',
						title: $(this).find('img').attr("title")
					}); 
				}
				return self.gallerylist;

			},
			changeZoomLevel: function(value){
				var self = this;   

				//flag a zoom, so can adjust the easing during setPosition     
				self.scrollingLock = true;   

				//round to two decimal places
				self.newvalue = parseFloat(value).toFixed(2);
				newvalue = parseFloat(value).toFixed(2);


				//maxwidth & Maxheight of the image
				maxheightnewvalue = self.largeHeight/((self.options.zoomWindowHeight / self.nzHeight) * self.nzHeight);     
				maxwidthtnewvalue = self.largeWidth/((self.options.zoomWindowWidth / self.nzWidth) * self.nzWidth);   	


				//calculate new heightratio
				if(self.options.zoomType != "inner")
				{
					if(maxheightnewvalue <= newvalue){
						self.heightRatio = (self.largeHeight/maxheightnewvalue) / self.nzHeight;
						self.newvalueheight = maxheightnewvalue;
						self.fullheight = true;

					}
					else{
						self.heightRatio = (self.largeHeight/newvalue) / self.nzHeight; 
						self.newvalueheight = newvalue;
						self.fullheight = false;

					}


//					calculate new width ratio

					if(maxwidthtnewvalue <= newvalue){
						self.widthRatio = (self.largeWidth/maxwidthtnewvalue) / self.nzWidth;
						self.newvaluewidth = maxwidthtnewvalue;
						self.fullwidth = true;

					}
					else{
						self.widthRatio = (self.largeWidth/newvalue) / self.nzWidth; 
						self.newvaluewidth = newvalue;
						self.fullwidth = false;

					}
					if(self.options.zoomType == "lens"){
						if(maxheightnewvalue <= newvalue){
							self.fullwidth = true;
							self.newvaluewidth = maxheightnewvalue;

						} else{
							self.widthRatio = (self.largeWidth/newvalue) / self.nzWidth; 
							self.newvaluewidth = newvalue;

							self.fullwidth = false;
						}}
				}


				if(self.options.zoomType == "inner")
				{
					maxheightnewvalue = parseFloat(self.largeHeight/self.nzHeight).toFixed(2);     
					maxwidthtnewvalue = parseFloat(self.largeWidth/self.nzWidth).toFixed(2);      
					if(newvalue > maxheightnewvalue){
						newvalue = maxheightnewvalue;
					}
					if(newvalue > maxwidthtnewvalue){
						newvalue = maxwidthtnewvalue;
					}      


					if(maxheightnewvalue <= newvalue){


						self.heightRatio = (self.largeHeight/newvalue) / self.nzHeight; 
						if(newvalue > maxheightnewvalue){
							self.newvalueheight = maxheightnewvalue;
						}else{
							self.newvalueheight = newvalue;
						}
						self.fullheight = true;


					}
					else{


						self.heightRatio = (self.largeHeight/newvalue) / self.nzHeight; 

						if(newvalue > maxheightnewvalue){

							self.newvalueheight = maxheightnewvalue;
						}else{
							self.newvalueheight = newvalue;
						}
						self.fullheight = false;
					}


					if(maxwidthtnewvalue <= newvalue){   

						self.widthRatio = (self.largeWidth/newvalue) / self.nzWidth; 
						if(newvalue > maxwidthtnewvalue){

							self.newvaluewidth = maxwidthtnewvalue;
						}else{
							self.newvaluewidth = newvalue;
						}

						self.fullwidth = true;


					}
					else{  

						self.widthRatio = (self.largeWidth/newvalue) / self.nzWidth; 
						self.newvaluewidth = newvalue;
						self.fullwidth = false;
					}        


				} //end inner
				scrcontinue = false;

				if(self.options.zoomType == "inner"){

					if(self.nzWidth > self.nzHeight){
						if( self.newvaluewidth <= maxwidthtnewvalue){
							scrcontinue = true;
						}
						else{

							scrcontinue = false;
							self.fullheight = true;
							self.fullwidth = true;
						}
					}
					if(self.nzHeight > self.nzWidth){     
						if( self.newvaluewidth <= maxwidthtnewvalue){
							scrcontinue = true;
						}
						else{
							scrcontinue = false;  

							self.fullheight = true;
							self.fullwidth = true;
						}
					}
				}

				if(self.options.zoomType != "inner"){
					scrcontinue = true;
				}

				if(scrcontinue){


					self.zoomLock = 0;
					self.changeZoom = true;

					//if lens height is less than image height


					if(((self.options.zoomWindowHeight)/self.heightRatio) <= self.nzHeight){


						self.currentZoomLevel = self.newvalueheight; 
						if(self.options.zoomType != "lens" && self.options.zoomType != "inner") {
							self.changeBgSize = true;

							self.zoomLens.css({height: String((self.options.zoomWindowHeight)/self.heightRatio) + 'px' }) 
						}
						if(self.options.zoomType == "lens" || self.options.zoomType == "inner") {  
							self.changeBgSize = true;  
						}	


					} 


					if((self.options.zoomWindowWidth/self.widthRatio) <= self.nzWidth){


						if(self.options.zoomType != "inner"){
							if(self.newvaluewidth > self.newvalueheight)   {
								self.currentZoomLevel = self.newvaluewidth;                 

							}
						}

						if(self.options.zoomType != "lens" && self.options.zoomType != "inner") {
							self.changeBgSize = true;

							self.zoomLens.css({width: String((self.options.zoomWindowWidth)/self.widthRatio) + 'px' })
						}
						if(self.options.zoomType == "lens" || self.options.zoomType == "inner") {  
							self.changeBgSize = true;
						}	

					}
					if(self.options.zoomType == "inner"){
						self.changeBgSize = true;  

						if(self.nzWidth > self.nzHeight){
							self.currentZoomLevel = self.newvaluewidth;
						}
						if(self.nzHeight > self.nzWidth){
							self.currentZoomLevel = self.newvaluewidth;
						}
					}

				}      //under

				//sets the boundry change, called in setWindowPos
				self.setPosition(self.currentLoc);
				//
			},
			closeAll: function(){
				if(self.zoomWindow){self.zoomWindow.hide();}
				if(self.zoomLens){self.zoomLens.hide();}
				if(self.zoomTint){self.zoomTint.hide();}
			},
			changeState: function(value){
      	var self = this;
				if(value == 'enable'){self.options.zoomEnabled = true;}
				if(value == 'disable'){self.options.zoomEnabled = false;}

			}

	};


	$.fn.elevateZoom = function( options ) {
		return this.each(function() {
			var elevate = Object.create( ElevateZoom );

			elevate.init( options, this );

			$.data( this, 'elevateZoom', elevate );

		});
	};

	$.fn.elevateZoom.options = {
			zoomActivation: "hover", // Can also be click (PLACEHOLDER FOR NEXT VERSION)
      	  	zoomEnabled: true, //false disables zoomwindow from showing
			preloading: 1, //by default, load all the images, if 0, then only load images after activated (PLACEHOLDER FOR NEXT VERSION)
			zoomLevel: 1, //default zoom level of image
			scrollZoom: false, //allow zoom on mousewheel, true to activate
			scrollZoomIncrement: 0.1,  //steps of the scrollzoom
			minZoomLevel: false,
			maxZoomLevel: false,
			easing: false,
			easingAmount: 12,
			lensSize: 300,
			zoomWindowWidth: 400,
			zoomWindowHeight: 400,
			zoomWindowOffetx: 10,
			zoomWindowOffety: 0,
			zoomWindowPosition: 1,
			zoomWindowBgColour: "#fff",
			lensFadeIn: false,
			lensFadeOut: false,
			debug: false,
			zoomWindowFadeIn: false,
			zoomWindowFadeOut: false,
			zoomWindowAlwaysShow: false,
			zoomTintFadeIn: false,
			zoomTintFadeOut: false,
			borderSize: 1,
			showLens: true,
			borderColour: "#FFF",
			lensBorderSize: 1,
			lensBorderColour: "#000",
			lensShape: "square", //can be "round" or "square"
			zoomType: "lens", //window is default,  also "lens" available -
			containLensZoom: true,
			lensColour: "white", //colour of the lens background
			lensOpacity: 0.4, //opacity of the lens
			lenszoom: false,
			tint: false, //enable the tinting
			tintColour: "#333", //default tint color, can be anything, red, #ccc, rgb(0,0,0)
			tintOpacity: 0.4, //opacity of the tint
			gallery: false,
			galleryActiveClass: "zoomGalleryActive",
			imageCrossfade: false,
			constrainType: false,  //width or height
			constrainSize: false,  //in pixels the dimensions you want to constrain on
			loadingIcon: false, //http://www.example.com/spinner.gif
			cursor:"default", // user should set to what they want the cursor as, if they have set a click function
			responsive:true,
			onComplete: $.noop,
			onZoomedImageLoaded: function() {},
			onImageSwap: $.noop,
			onImageSwapComplete: $.noop
	};

})( jQuery, window, document );
